# Supplementary material for: The Effects of a Low Sodium Meal Plan on Blood Pressure in Older Adults: The SOTRUE Randomized Feasibility Trial
Source: Nutrients. 2021 Mar 16;13(3):964. doi: 10.3390/nu13030964 (PMC8002543; doi:10.3390/nu13030964)
Supplement: Supplementary file 1 [file nutrients-13-00964-s001.zip]

Archive with 5 entries (5 files):
- Supplemental Material/CONSORT 2010 Checklist_SOTRUE.doc
- Supplemental Material/Final protocol.pdf
- Supplemental Material/Final SAP.pdf
- Supplemental Material/REV. Supplement Materials - Methods and Tables and Figures_MARKED.docx
- Supplemental Material/REV. Supplement Materials - Methods and Tables and Figures_UNMARKED.docx
